# Supplementary material for: The dual role of p62 in ferroptosis of glioblastoma according to p53 status
Source: PubMed Central journal article supplement (PMC8881833; doi:10.1186/s13578-022-00764-z), 2022-02-25

U251  
(P53 mutant)

DAPI

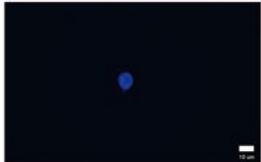

P53

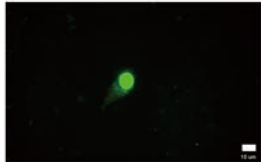

P62

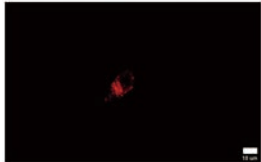

Merge

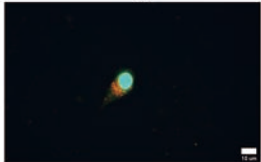

Supplement: 13578_2022_764_MOESM2_ESM.pdf [file 13578_2022_764_MOESM2_ESM.pdf]
