# Supplementary material for: The dual role of p62 in ferroptosis of glioblastoma according to p53 status
Source: PubMed Central journal article supplement (PMC8881833; doi:10.1186/s13578-022-00764-z), 2022-02-25

# QoS

CLASSIFIER

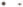

CLASSIFIER

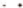

OUTPUT

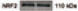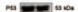

INPUT

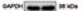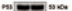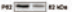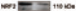

Supplement: 13578_2022_764_MOESM7_ESM.pdf [file 13578_2022_764_MOESM7_ESM.pdf]
